# Supplementary material
Source: PubMed Central journal article supplement (PMC6660753)
Supplement: pnas.1900163116.sapp.pdf [file pnas.1900163116.sapp.pdf]

## **Dynamic Allostery based molecular workings of Kinase:Peptide complexes**

Lalima G. Ahuja<sup>1#\*</sup>, Phillip C. Aoto<sup>1#</sup>, Alexandr P. Kornev<sup>1</sup>, Gianluigi Veglia<sup>2,3</sup> and Susan S. Taylor<sup>1,4\*</sup>

<sup>1</sup> Department of Pharmacology and <sup>4</sup>Chemistry and Biochemistry, University of California at San Diego,  
La Jolla, CA 92093

<sup>2</sup>Department of Chemistry and <sup>3</sup>Biochemistry, Molecular Biology, and Biophysics, University of  
Minnesota, Minneapolis, MN 55455

# Equal Contribution

\*To whom the correspondence should be addressed

Dr. Lalima G. Ahuja and Prof. Susan S. Taylor

Department of Chemistry and Biochemistry, University of California- San Diego, 9500 Gilman Dr. CMM  
W 125, La Jolla, CA 92093. Telephone: (858) 534-3677. Fax: (858) 534-8193.

Email: LGA: [lalima1312@gmail.com](mailto:lalima1312@gmail.com); SST: [staylor@ucsd.edu](mailto:staylor@ucsd.edu)



Fig S2: Comparison of the RMSF (snapshots over simulation time) with the B-factors obtained from the crystal structures of the IP20 and Phospholamban bound structures of PKA. Simulations provide the phospholamban peptide the desired conformational flexibility as is already reported in its crystal structure.

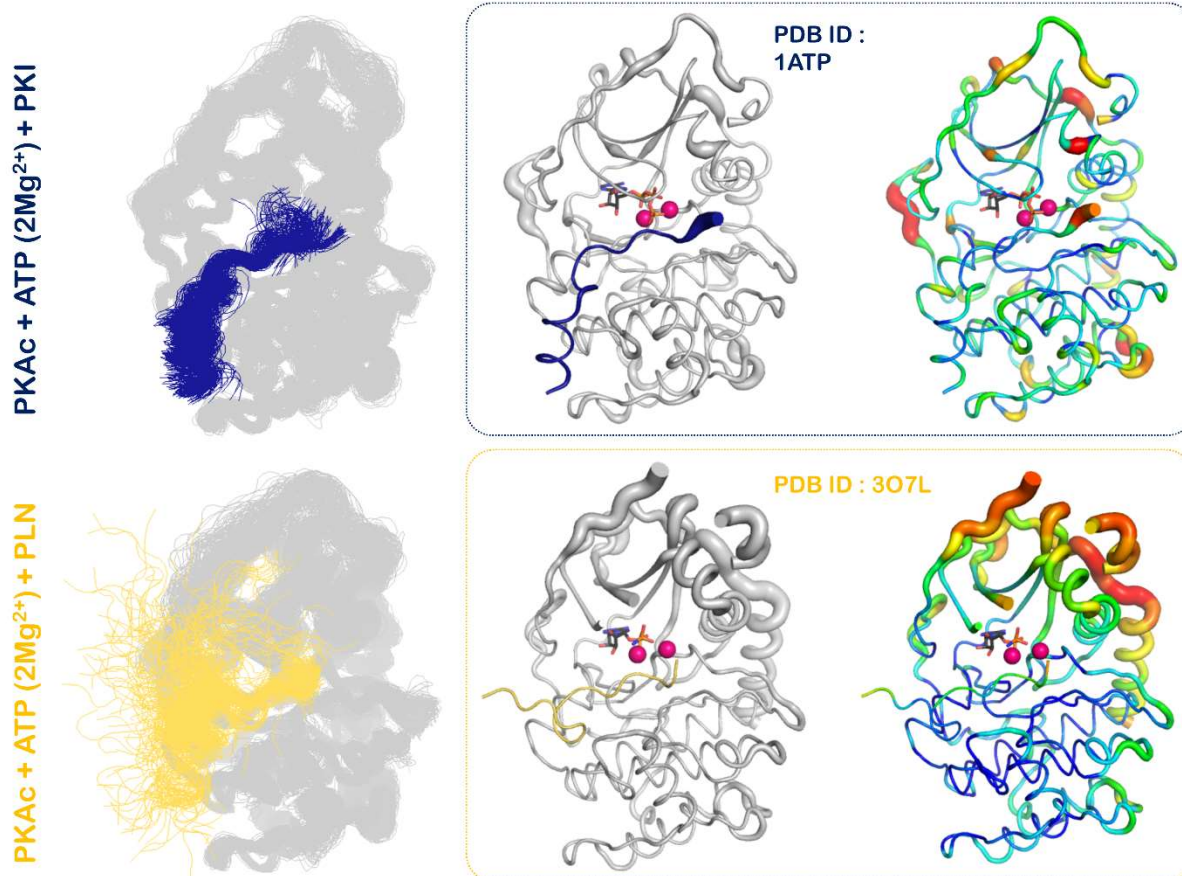

Fig S3: Contact Maps for the seven Kinase:Peptide complexes obtained over the 5.4 $\mu$ sec simulation time

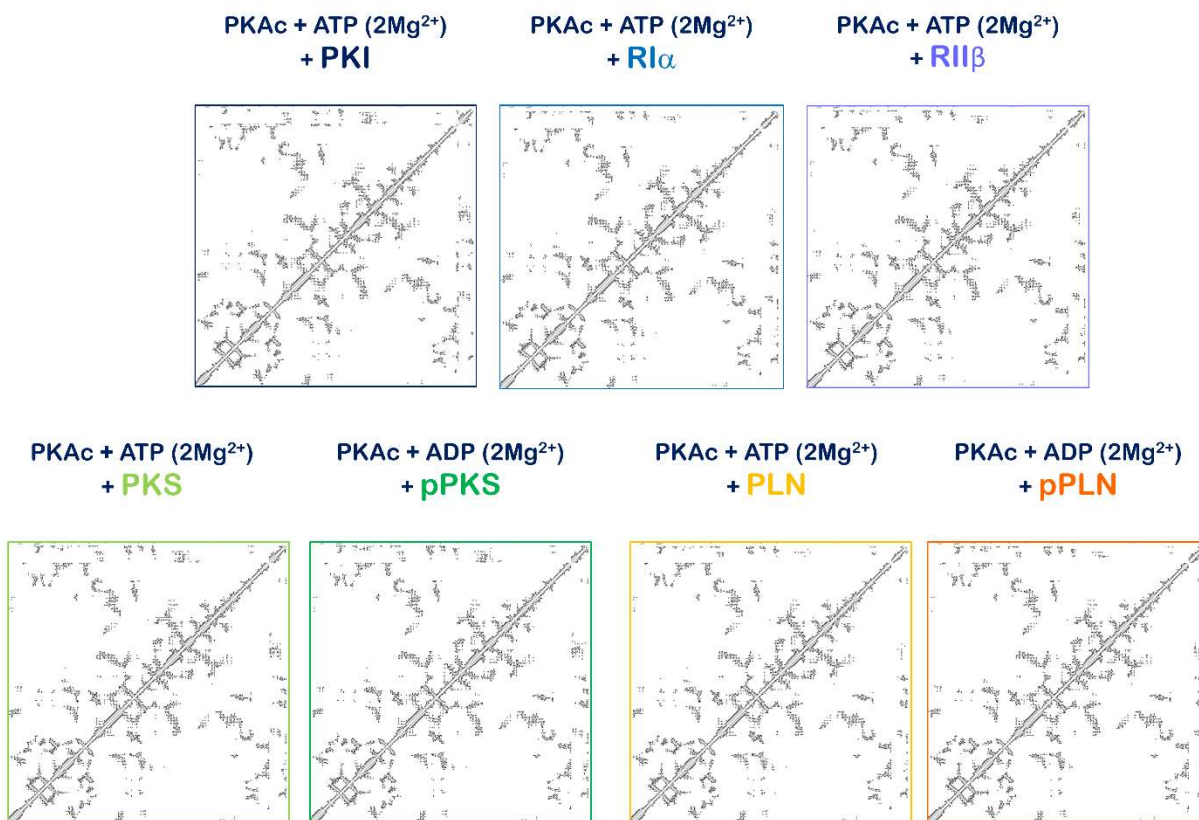

Fig S4: Mutual Information Matrices for the seven Kinase:Peptide complexes obtained over the 5.4 $\mu$ sec simulation time

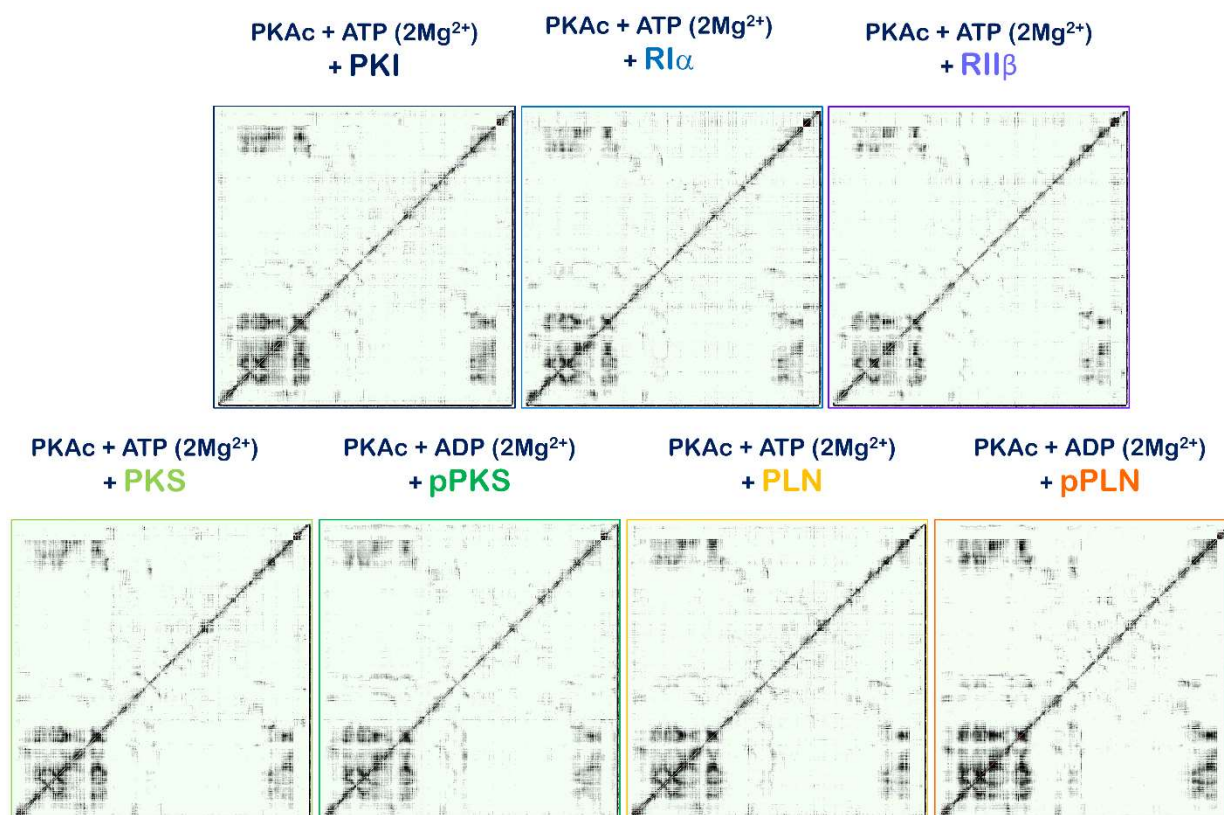

Fig S5: The community network at the hydrophobic core varies in the seven Kinase:Peptide complexes in accordance with the signatures of their molecular recognition.

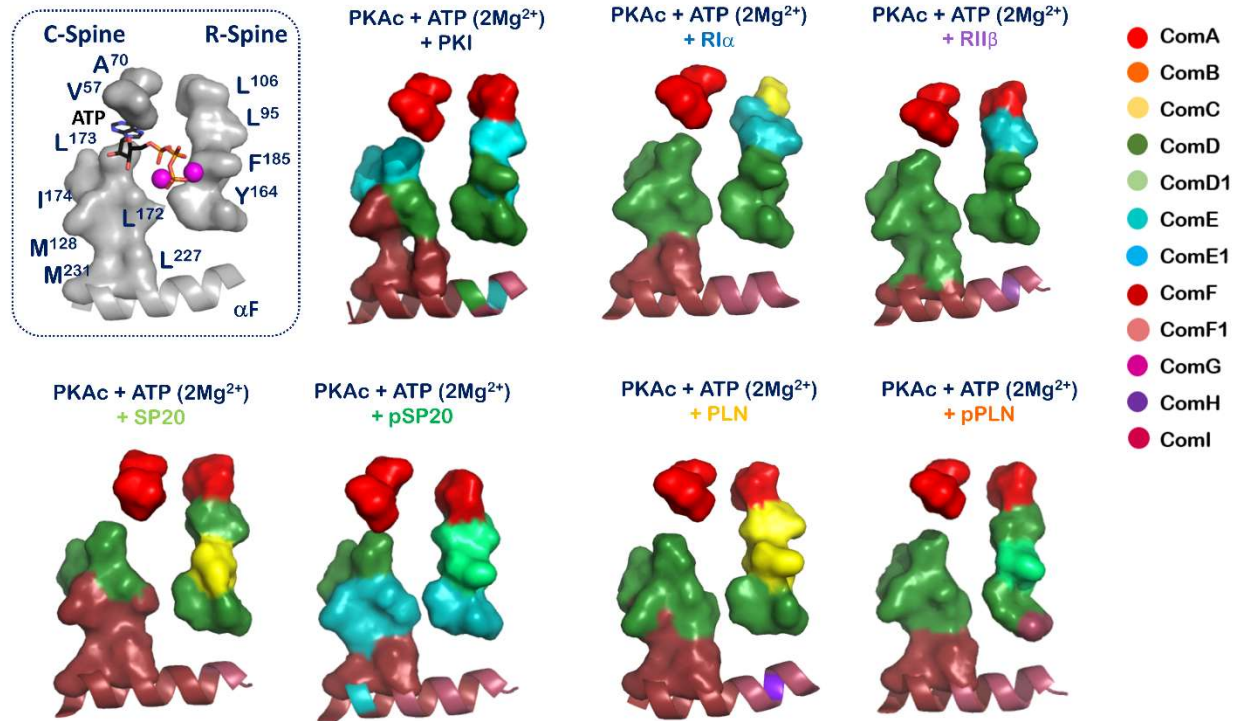

Fig S6: Community Maps of the three Kinase:inhibitor complexes showing the community dynamic behavior of R133 and D328 residues.

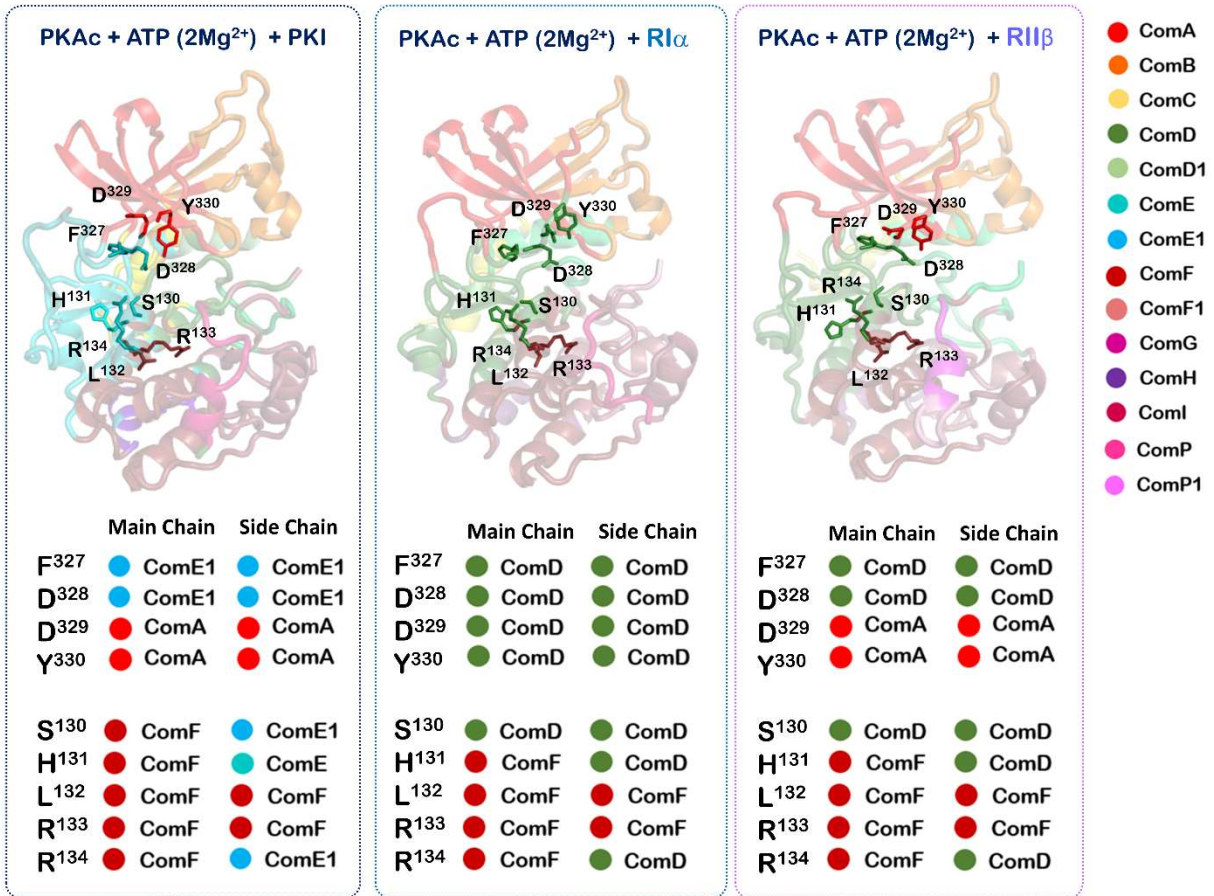

Fig S7: Free energy landscape of the MD simulations of the seven Kinase:Peptide complexes. Dynamics is measured for the peptide in the complex. Dynamics measured between P-site (Ser/Ala etc)- Calpha of the peptide and D166- Calpha of the YRD motif alongside between R-Calpha and E170-Calpha of the activation segment.

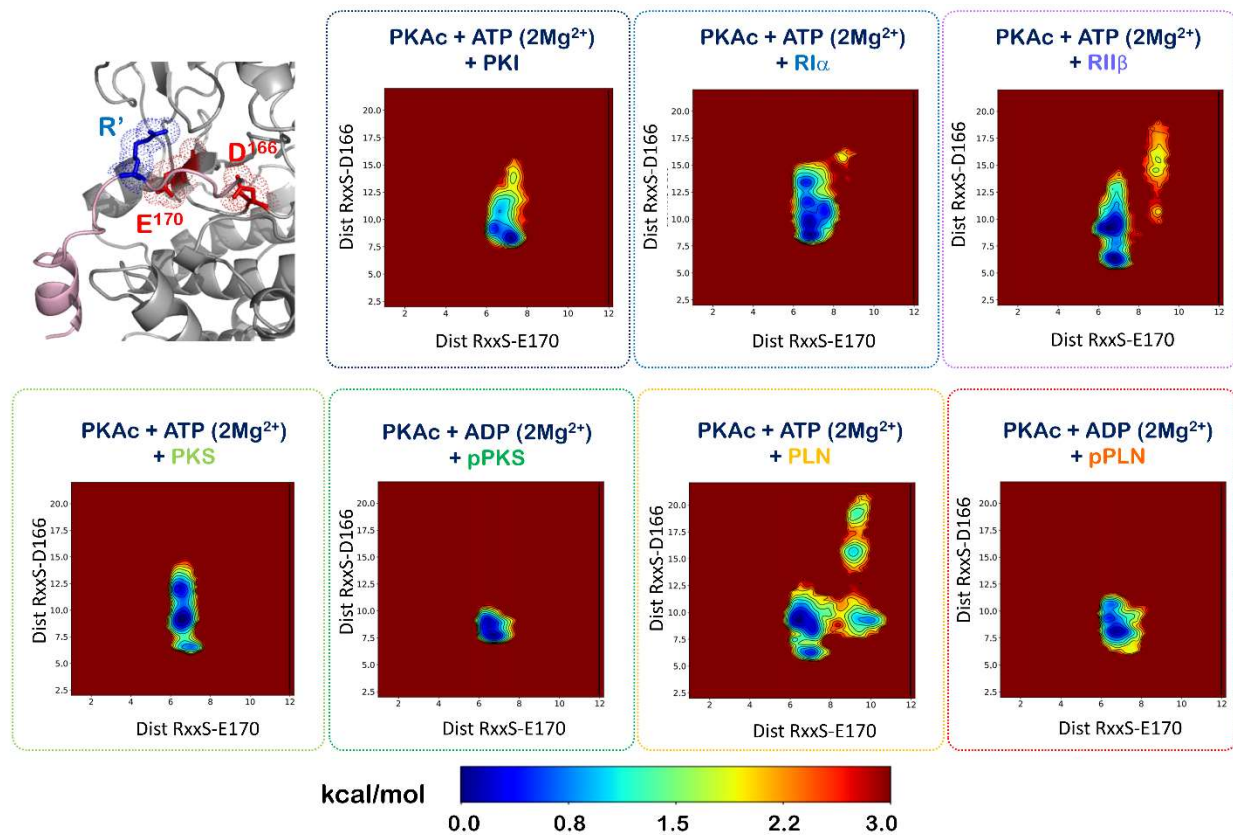



Table S1: Bridging residues for community maps of PKAc: PKI complex

| Number | Residue | Main Chain | Side Chain |
|--------|---------|------------|------------|
| 1      | SER 34  | COM A      | COM C      |
| 2      | SER 35  | COM A      | COM C      |
| 3      | LYS 72  | COM A      | COM B      |
| 4      | GLU 86  | COM B      | COM D2     |
| 5      | LYS 92  | COM B      | COM A      |
| 6      | ARG 93  | COM C      | COM E      |
| 7      | LEU 95  | COM C      | COM E      |
| 8      | GLN 96  | COM C      | COM B      |
| 9      | PHE 100 | COM C      | COM E      |
| 10     | MET 118 | COM A      | COM B      |
| 11     | ALA 124 | COM E      | COM E1     |
| 12     | SER 130 | COM F      | COM E1     |
| 13     | HIS 131 | COM F      | COM E      |
| 14     | ARG 134 | COM F      | COM E1     |
| 15     | PHE 154 | COM E      | COM D      |
| 16     | LEU 157 | COM D1     | COM D      |
| 17     | HIS 158 | COM D      | COM H      |
| 18     | ILE 163 | COM D      | COM D1     |
| 19     | ARG 165 | COM D      | COM D1     |
| 20     | LYS 168 | COM F      | COM D      |
| 21     | VAL 182 | COM E      | COM D      |
| 22     | THR 183 | COM E      | COM D      |
| 23     | PHE 185 | COM D      | COM E      |
| 24     | ARG 190 | COM D1     | COM C      |
| 25     | ARG 194 | COM D1     | COM F1     |
| 26     | T2P 197 | COM F1     | COM D1     |
| 27     | THR 201 | COM F1     | COM D      |
| 28     | TYR 204 | COM F1     | COM F      |
| 29     | ASN 216 | COM D1     | COM F1     |
| 30     | LYS 217 | COM D      | COM F1     |
| 31     | ASP 220 | COM F      | COM F1     |
| 32     | TRP 221 | COM F      | COM E      |
| 33     | TRP 222 | COM F      | COM F1     |
| 34     | ALA 223 | COM F      | COM D      |
| 35     | ASN 271 | COM F      | COM H      |
| 36     | LEU 273 | COM F1     | COM F      |
| 37     | LYS 292 | COM H      | COM E      |
| 38     | HIS 294 | COM F      | COM H      |
| 39     | THR 299 | COM E      | COM F      |
| 40     | TYR 306 | COM E      | COM C      |
| 41     | PRO 313 | COM F      | COM E      |
| 42     | THR 324 | COM E1     | COM A      |

|    |               |        |        |
|----|---------------|--------|--------|
| 43 | GLU 334       | COM B  | COM A  |
| 44 | ILE 335       | COM B  | COM A  |
| 45 | THR 354       | COM D  | COM A  |
| 46 | ILE 360 (PKI) | COM P  | COM F  |
| 47 | ARG 368 (PKI) | COM D  | COM E1 |
| 48 | ASN 360 (PKI) | COM F1 | COM F  |
| 49 | ILE 371 (PKI) | COM D  | COM F1 |

RES 34

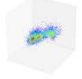

RES 35

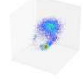

RES 72

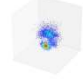

RES 86

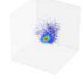

RES 92

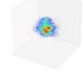

RES 93

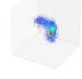

RES 95

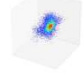

RES 96

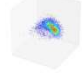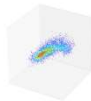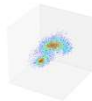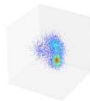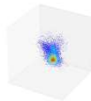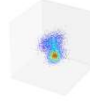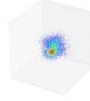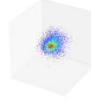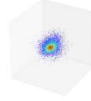

RES 100

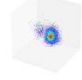

RES 118

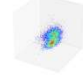

RES 124

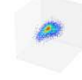

RES 130

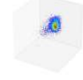

RES 131

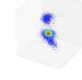

RES 134

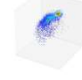

RES 154

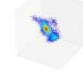

RES 157

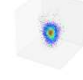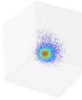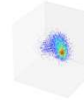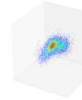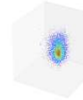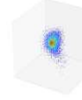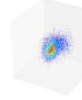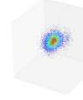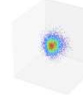

RES 158

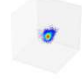

RES 163

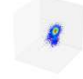

RES 165

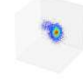

RES 168

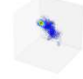

RES 182

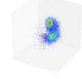

RES 183

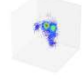

RES 185

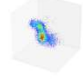

RES 190

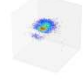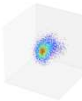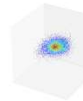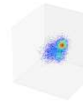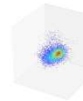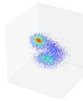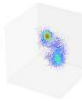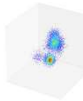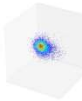

RES 194

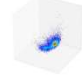

RES 197

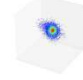

RES 201

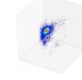

RES 204

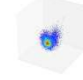

RES 216

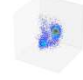

RES 217

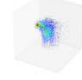

RES 220

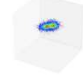

RES 221

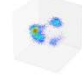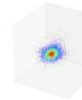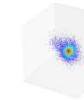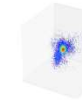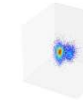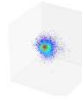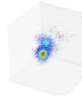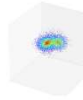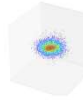

RES 222

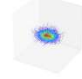

RES 223

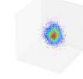

RES 271

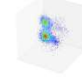

RES 273

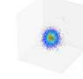

RES 292

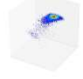

RES 294

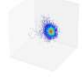

RES 299

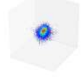

RES 306

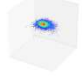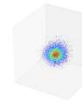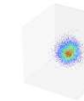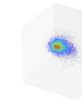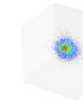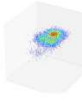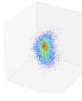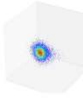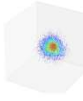

RES 313

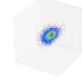

RES 324

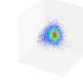

RES 334

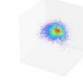

RES 335

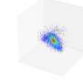

RES 354

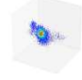

RES 360

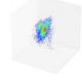

RES 368

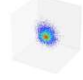

RES 370

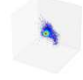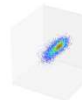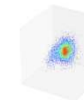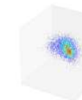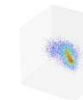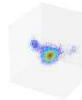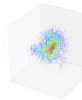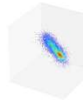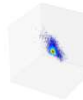

RES 371

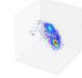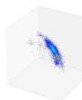

Table S2: Bridging residues for community maps of PKAc : RI $\alpha$  complex

| Number | Residue       | Main Chain | Side Chain |
|--------|---------------|------------|------------|
| 1      | TRP 30        | COM C      | COM E      |
| 2      | SER 34        | COM A      | COM C      |
| 3      | GLY 55        | COM B      | COM A      |
| 4      | ILE 73        | COM B      | COM A      |
| 5      | THR 88        | COM E      | COM B      |
| 6      | LYS 92        | COM E      | COM B      |
| 7      | ILE 94        | COM C      | COM E      |
| 8      | GLN 96        | COM C      | COM E      |
| 9      | LEU 103       | COM D      | COM C      |
| 10     | VAL 104       | COM E      | COM D      |
| 11     | LYS 105       | COM E      | COM C      |
| 12     | TYR 117       | COM A      | COM B      |
| 13     | MET 128       | COM A      | COM B      |
| 14     | HIS 131       | COM F      | COM D      |
| 15     | ARG 134       | COM F      | COM D      |
| 16     | ALA 147       | COM D      | COM F      |
| 17     | PHE 154       | COM H      | COM F1     |
| 18     | LEU 157       | COM C      | COM D      |
| 19     | HIS 158       | COM C      | COM H      |
| 20     | PRO 169       | COM F      | COM D      |
| 21     | GLU 170       | COM D      | COM F      |
| 22     | PHE 187       | COM E      | COM F1     |
| 23     | ARG 190       | COM E      | COM C      |
| 24     | T2P 197       | COM F1     | COM E      |
| 25     | GLY 200       | COM F1     | COM E      |
| 26     | THR 201       | COM F1     | COM F      |
| 27     | GLU 203       | COM F1     | COM F      |
| 28     | LEU 224       | COM F      | COM D      |
| 29     | ASN 271       | COM H      | COM F      |
| 30     | LEU 273       | COM F1     | COM F      |
| 31     | LYS 285       | COM H      | COM F1     |
| 32     | ALA 298       | COM H      | COM F      |
| 33     | THR 300       | COM D      | COM F      |
| 34     | TRP 302       | COM D      | COM H      |
| 35     | PRO 313       | COM F      | COM D      |
| 36     | LYS 317       | COM D      | COM A      |
| 37     | ASP 329       | COM A      | COM D      |
| 38     | TYR 330       | COM A      | COM D      |
| 39     | ILE 335       | COM B      | COM A      |
| 40     | ARG 364 (R1a) | COM F      | COM D      |
| 41     | GLY 366 (R1a) | COM F      | COM P1     |

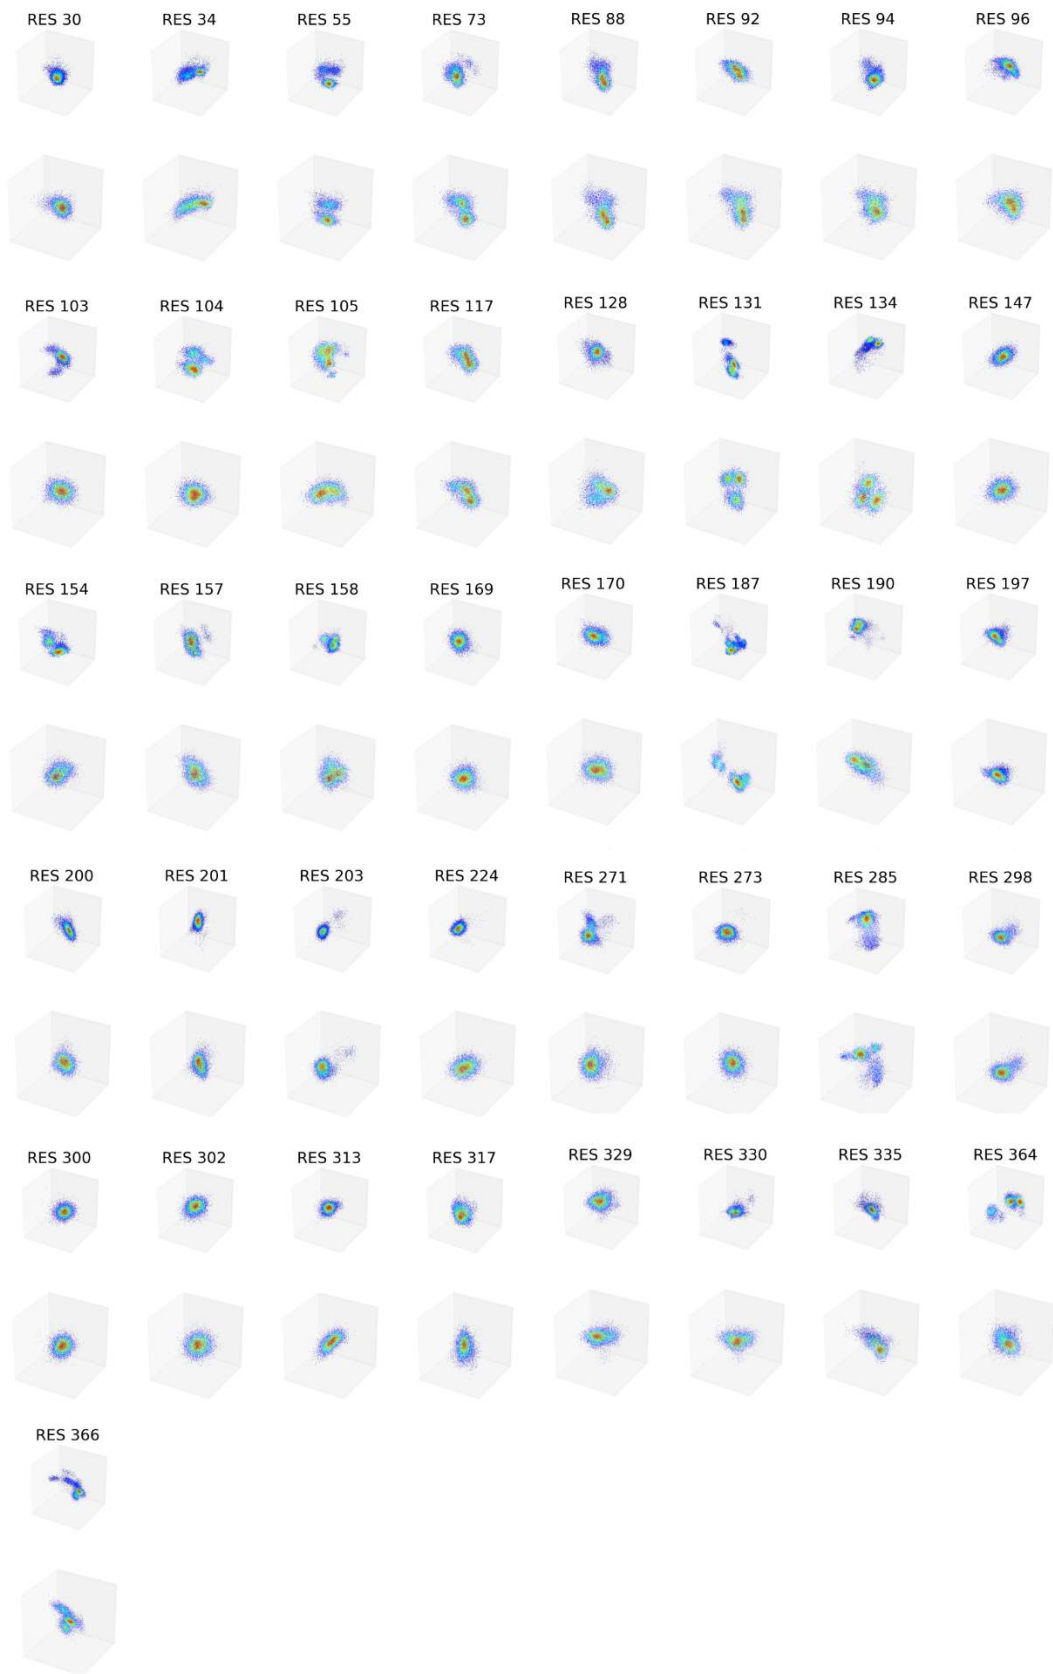

Table S3: Bridging residues for community maps of PKAc : RII $\beta$  complex

| Number | Residue        | Main Chain | Side Chain |
|--------|----------------|------------|------------|
| 1      | TRP 30         | COM C      | COM D1     |
| 2      | GLN 35         | COM A      | COM C      |
| 3      | GLY 52         | COM A      | COM B      |
| 4      | GLY 55         | COM B      | COM A      |
| 5      | ILE 73         | COM A      | COM B      |
| 6      | GLU 86         | COM D1     | COM B      |
| 7      | LYS 92         | COM D1     | COM B      |
| 8      | ARG 93         | COM C      | COM D1     |
| 9      | ILE 94         | COM C      | COM D1     |
| 10     | LEU 95         | COM C      | COM D1     |
| 11     | PHE 100        | COM C      | COM D      |
| 12     | LYS 105        | COM D      | COM A      |
| 13     | PHE 129        | COM D      | COM F      |
| 14     | HIS 131        | COM F      | COM D      |
| 15     | ARG 134        | COM F      | COM D      |
| 16     | PRO 141        | COM F      | COM D      |
| 17     | ALA 147        | COM D      | COM F      |
| 18     | GLU 155        | COM H      | COM D      |
| 19     | LEU 157        | COM C      | COM D1     |
| 20     | HIS 158        | COM C      | COM H      |
| 21     | TYR 164        | COM D1     | COM D      |
| 22     | ARG 165        | COM F1     | COM D1     |
| 23     | PHE 185        | COM D1     | COM D      |
| 24     | ARG 180        | COM D1     | COM C      |
| 25     | TYR 204        | COM F1     | COM F      |
| 26     | LYS 213        | COM D1     | COM F1     |
| 27     | LEU 224        | COM F      | COM D      |
| 28     | LEU 227        | COM F      | COM D      |
| 29     | MET 231        | COM F      | COM D      |
| 30     | GLY 253        | COM F1     | COM F      |
| 31     | LEU 273        | COM F1     | COM F      |
| 32     | HIS 294        | COM H      | COM F      |
| 33     | TYR 306        | COM D      | COM C      |
| 34     | PHE 318        | COM D      | COM A      |
| 35     | PHE 327        | COM A      | COM D      |
| 36     | THR 363 (RIIb) | COM F      | COM P      |
| 37     | ARG 365 (RIIb) | COM D      | COM F      |
| 38     | ALA 366 (RIIb) | COM D1     | COM D      |

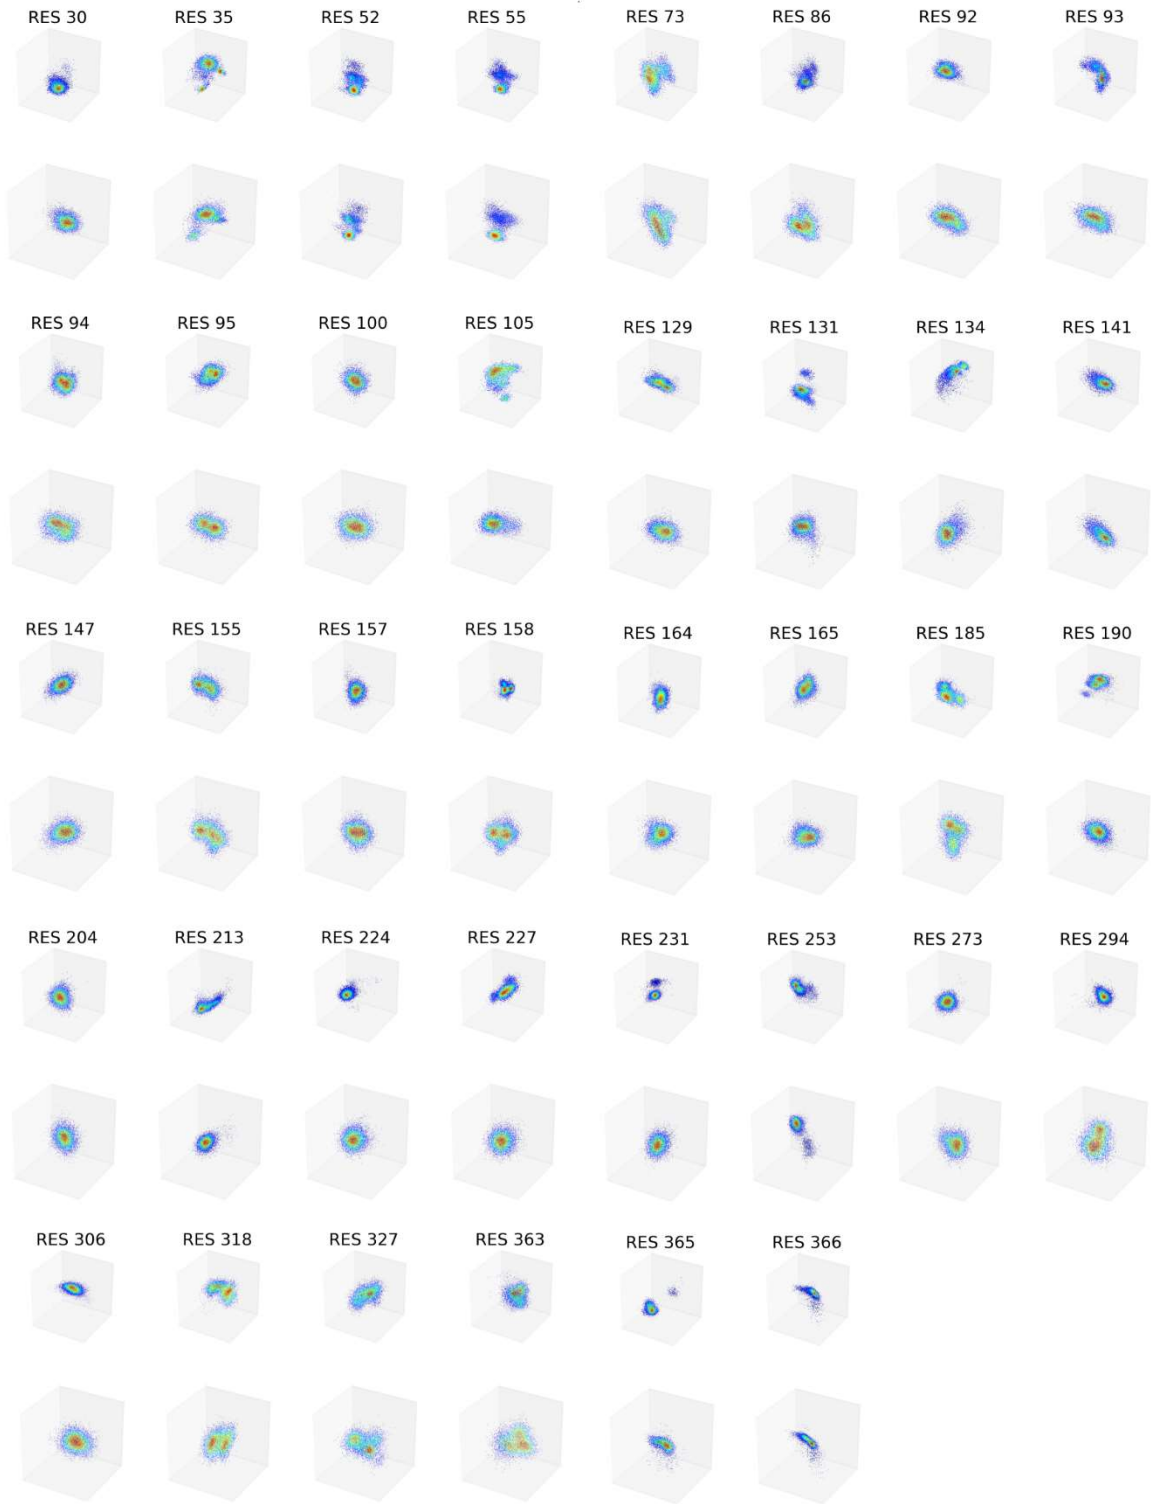

**Video S1:** Community Map of PKA:ATP:IP20 mapped on the Kinase domain

**Video S2:** Community Map of PKA:ATP:RI $\alpha$  mapped on the Kinase domain

**Video S3:** Community Map of PKA:ATP:RII $\beta$  mapped on the Kinase domain

**Video S4:** Community Map of PKA:ATP:SP20 mapped on the Kinase domain

**Video S5:** Community Map of PKA:ATP:pSP20 mapped on the Kinase domain

**Video S6:** Community Map of PKA:ATP:PLN mapped on the Kinase domain

**Video S7:** Community Map of PKA:ATP:pPLN mapped on the Kinase domain
